# Supplementary material for: Compared to casein, bovine lactoferrin reduces plasma leptin and corticosterone and affects hypothalamic gene expression without altering weight gain or fat mass in high fat diet fed C57/BL6J mice
Source: PubMed Central journal article supplement (PMC4672495; doi:10.1186/s12986-015-0049-7), 2015-12-08
Supplement: 12986_2015_49_MOESM1_ESM.pdf [file 12986_2015_49_MOESM1_ESM.pdf]

**Supplemental Table 1. Diet composition**

|                                       | (LFD)<br>D12450B |      | (HFD)<br>D12451 |      | (HFD+Lac)<br>D12011802 |      |
|---------------------------------------|------------------|------|-----------------|------|------------------------|------|
| %                                     | g                | kcal | g               | kcal | g                      | kcal |
| Protein                               | 19.2             | 20   | 23.7            | 20   | 23.7                   | 20   |
| Carbohydrate                          | 67.3             | 70   | 41.4            | 35   | 41.4                   | 35   |
| Fat                                   | 4.3              | 10   | 23.6            | 45   | 23.6                   | 45   |
| Total                                 |                  | 100  |                 | 100  |                        | 100  |
| kcal/g                                | 3.8              |      | 4.7             |      | 4.7                    |      |
| Ingredients                           | g                | kcal | g               | kcal | g                      | kcal |
| Casein                                | 200              | 800  | 200             | 800  | 0                      | 0    |
| Lactoferrin                           | 0                | 0    | 0               | 0    | 200                    | 800  |
| L-Cystine                             | 3                | 12   | 3               | 12   | 3                      | 12   |
| Corn Starch                           | 315              | 1260 | 72.8            | 291  | 72.8                   | 291  |
| Maltodextrin 10                       | 35               | 140  | 100             | 400  | 100                    | 400  |
| Sucrose                               | 350              | 1400 | 172.8           | 691  | 172.8                  | 691  |
| Cellulose, BW200                      | 50               | 0    | 50              | 0    | 50                     | 0    |
| Soybean oil                           | 25               | 225  | 25              | 225  | 25                     | 225  |
| Lard                                  | 20               | 180  | 177.5           | 1598 | 177.5                  | 1598 |
| Mineral Mix S10026                    | 10               | 0    | 10              | 0    | 10                     | 0    |
| DiCalcium Phosphate                   | 13               | 0    | 13              | 0    | 13                     | 0    |
| Calcium Carbonate                     | 5.5              | 0    | 5.5             | 0    | 5.5                    | 0    |
| Potassium Citrate, 1 H <sub>2</sub> O | 16.5             | 0    | 16.5            | 0    | 16.5                   | 0    |
| Vitamin Mix V10001                    | 10               | 40   | 10              | 40   | 10                     | 40   |
| Choline Bitartrate                    | 2                | 0    | 2               | 0    | 2                      | 0    |
| FD&C Yellow Dye 5                     | 0.05             | 0    | 0               | 0    | 0                      | 0    |
| FD&C Red Dye 40                       | 0                | 0    | 0.05            | 0    | 0                      | 0    |
| FD&C Blue Dye 1                       | 0                | 0    | 0               | 0    | 0.05                   | 0    |
| Total                                 | 1055.05          | 4057 | 858.15          | 4057 | 858.15                 | 4057 |

Abbreviations: LFD, 10% energy fat, 20% energy casein; HFD, 45% energy fat, 20% energy casein; HFD+Lac, 45% energy fat, 20% energy bovine lactoferrin
