# Supplementary material for: Compared to casein, bovine lactoferrin reduces plasma leptin and corticosterone and affects hypothalamic gene expression without altering weight gain or fat mass in high fat diet fed C57/BL6J mice
Source: PubMed Central journal article supplement (PMC4672495; doi:10.1186/s12986-015-0049-7), 2015-12-08
Supplement: 12986_2015_49_MOESM2_ESM.pdf [file 12986_2015_49_MOESM2_ESM.pdf]

**Supplementary Table 2.** Sequences of primers<sup>1</sup> used in gene expression analysis

| Gene            | Forward Primer (5'-3')            | Reverse Primer (5'-3')              |
|-----------------|-----------------------------------|-------------------------------------|
| B3AR            | 5'- CGCCTTCAACCCGGTCACTACTG -3'   | 5'- GGTGGACTCTGCCTGGCTTCAAC -3'     |
| CEBPA           | 5'- GGGTGGCGGGGCTGACTTTGACTAC -3' | 5'- CGCGCTCGTACAGGGGCTCCAG -3'      |
| CEBPD           | 5'- TCGCCGACCTTCAACAGCAACC -3'    | 5'- GTCGCCGTCGCCCCAGTCG -3'         |
| CD36            | 5'- CCGGTGTGGTGGCTGCTTCTC -3'     | 5'- GCTGCCATCTCCCCGCCATAAATG -3'    |
| CPT1B           | 5'- CGAGAGGGGCGGACTGAGACTG -3'    | 5'- GGCTAGGCGGTACATGTTTTGGTG -3'    |
| CRH             | 5'-GGAATGGCCCGGGCAGAGCAG-3'       | 5'-TGGCCAAGCGCAACATTTCAATTC-3'      |
| FASN            | 5'- TCCACCTTTAAGTTGCCCTG -3'      | 5'- TCTGCTCTCGTCATGTCACC -3'        |
| FATP1           | 5'- CCGGTGTGGTGGCTGCTTCTC -3'     | 5'- GCTGCCATCTCCCCGCCATAAATG -3'    |
| FGF21           | 5'-AGCGCAGCCCTGATG-3'             | 5'-TCAGGGATGGGGTAT-3'               |
| GCCR            | 5'- ACCTGACTTCTTGGGGGCTATGA -3'   | 5'- CAGGCAGAGTTTGGGAGGTGGTC -3'     |
| GLUT4           | 5'- GGCCCTGCCGAAAGAGTC -3'        | 5'- AGGAGCTGGAGCAAGGAC -3'          |
| HSD11B1         | 5'- CCTTGGCTGGGAAAATGACC -3'      | 5'- CTATGAGGCCAAGGACACAGAGAG -3'    |
| INSR            | 5'- GATTTCCCAACGTCTCCTCTAC -3'    | 5'- CAATGCGGTACCCAGTGAAGTG -3'      |
| IRS1            | 5'- GCGCAGGCACCATCTCAACAACC -3'   | 5'- GCACGCACCCGGAAGGAACC -3'        |
| LEP             | 5'- CCCCGCACCCGCTGGAAGTAC -3'     | 5'- ATGTGCCCTGAAATGCGGTAT -3'       |
| LPL             | 5'- TGCTCCCAACAATATAAGACTCC -3'   | 5'- AAGGCCAGGTGTTCAATC -3'          |
| NPY             | 5'- CTCGCTCTGCGACACTACA -3'       | 5'- AATCAGTGTCTCAGGGCTGGA -3'       |
| ObR             | 5'- GACCACCGAACACAACCGATGAC -3'   | 5'- ACACCTAGCTGGCGAAAACTGAAG -3'    |
| PPARA           | 5'- ATGGGGGTGATCGGAGGCTAATAG -3'  | 5'- GGGTGGCAGGAAGGGAACAGAC -3'      |
| PPARG           | 5'- TCAGGTTTGGGCGGATGC -3'        | 5'- TCAGCGGGAAGGACTTTATGTATG -3'    |
| POMC            | 5'- GGGCAAGCGCTCCTACTCCATG -3'    | 5'- CTCGCCTTCCAGCTCCCTCTTG -3'      |
| UCP3            | 5'- ACAGGCCACACGGTCCAGAACC -3'    | 5'- CCCATCAGGTCAAGTCAAAAACAGAGG -3' |
| V1A             | 5'-CTAACAAACCGAAGCCCAACAAAC-3'    | 5'-ACACAAGCCCCGTCCAAGAGTC-3'        |
| Reference Genes |                                   |                                     |
| 18-S            | 5'- AGGACCGCGTTCTATTTTGTGG -3'    | 5'- ATGCTTTCGCTCTGGTCCGCTCTG -3'    |
| ACTB            | 5'- AGAGGGAAATCGTGCGTGAC -3'      | 5'- CAATAGTGATGACCTGGCCGT -3'       |
| YWHAZ           | 5'- CGGAGCTGCGTGACATCTGC -3'      | 5'- CCTCGCCAAGTAACGGTAGTAG -3'      |

<sup>1</sup> B3AR, Beta-3 Adrenergic Receptor; CEBPA/D, CCAAT/Enhancer Binding Protein alpha/delta; CD36, fatty acid translocase CPT1/B, Carnitine Palmitoyltransferase B; CRH, corticosterone hormone; FABP1, Fatty Acid Binding Protein 1; FASN, Fatty Acid Synthase; FATP1, Fatty Acid Transport Protein 1; FGF21, fibroblast growth factor; GCCR, Glucocorticoid Receptor; GLUT4, glucose transporter 4; HSD11B1, Hydroxysteroid (11-beta) Dehydrogenase 1; INSR, insulin receptor; IRS1, insulin receptor substrate 1; LEP, Leptin; LPL, Lipoprotein Lipase; NPY, Neuropeptide Y; ObR, Leptin Receptor; PPARA/G, Peroxisome Proliferator-Activated Receptor alpha/gamma; POMC, Pro-opiomelanocortin; UCP 3, Uncoupling Protein 3; V1A, arginine vasopressin receptor 1a  
18-S, 18-S ribosomal RNA; ACTB, Beta Actin; YWHAZ, Tyrosine 3-monooxygenase/ Tryptophan 5-monooxygenase Activation Protein Zeta Polypeptide
